# Supplementary material for: ATM-Inhibitor AZD1390 Is a Radiosensitizer for Breast Cancer CNS Metastasis
Source: PubMed Central journal article supplement — Clin Cancer Res. 2023 Aug 16;29(21):4492–503. doi: 10.1158/1078-0432.CCR-23-0290 (PMC10618650; doi:10.1158/1078-0432.ccr-23-0290), 2023-08-16
Supplement: ccr-23-0290_supplementary_figure_s1_suppfs1.pdf [file ccr-23-0290_supplementary_figure_s1_suppfs1.pdf]

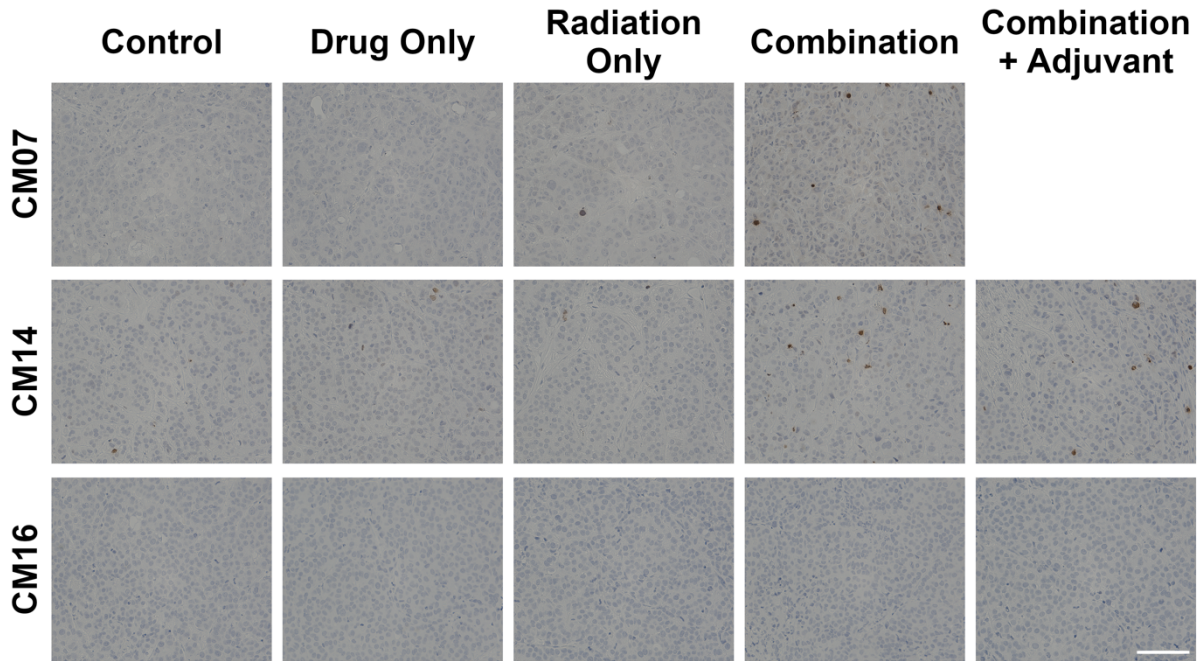

**Supplemental Figure 1. Immunohistochemistry (IHC) staining of  $\gamma$ H2AX at experimental endpoint.**

At the experimental endpoint when animals were euthanized, the presence of DNA double-stranded breaks (DSBs) was assessed by immunohistochemistry staining of  $\gamma$ H2AX between treatment groups in all models. Scale bar represents 100  $\mu$ m.
