# Supplementary material for: ATM-Inhibitor AZD1390 Is a Radiosensitizer for Breast Cancer CNS Metastasis
Source: PubMed Central journal article supplement — Clin Cancer Res. 2023 Aug 16;29(21):4492–503. doi: 10.1158/1078-0432.CCR-23-0290 (PMC10618650; doi:10.1158/1078-0432.ccr-23-0290), 2023-08-16
Supplement: ccr-23-0290_supplementary_figure_s2_suppfs2.pdf [file ccr-23-0290_supplementary_figure_s2_suppfs2.pdf]

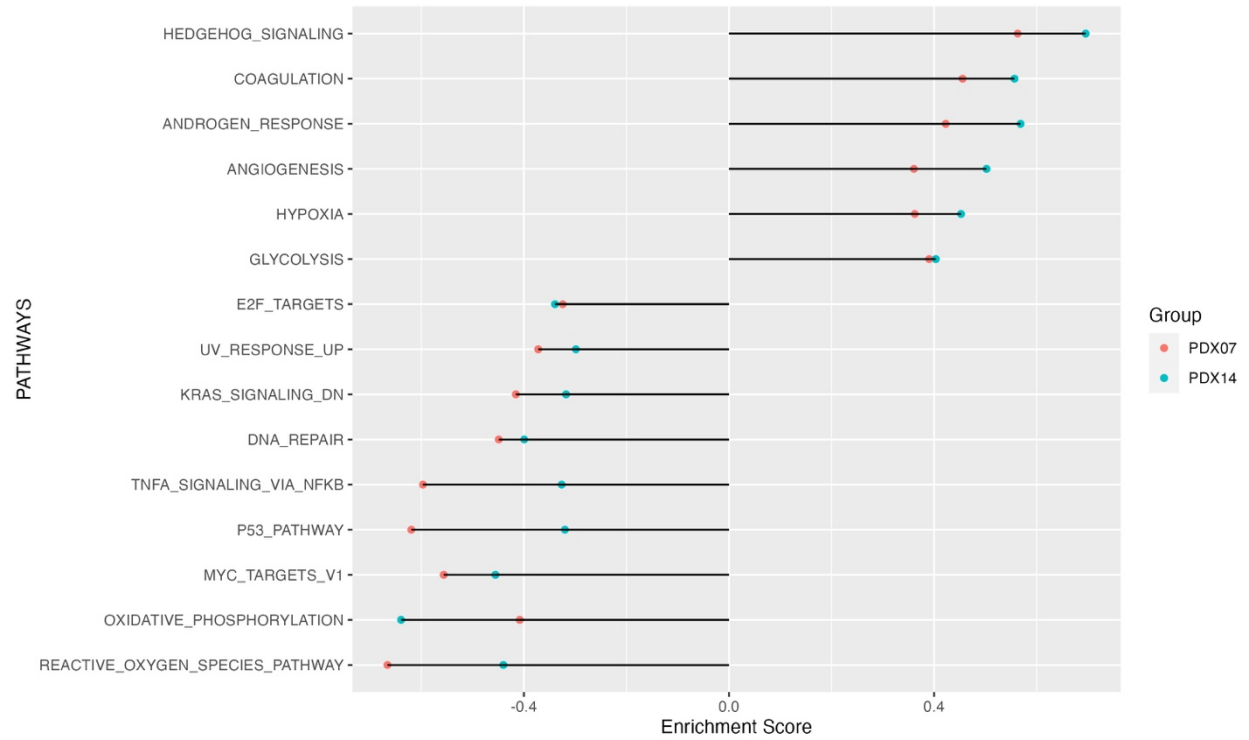

**Supplemental Figure 2. Gene set enrichment analysis (GSEA) of progression versus stable tumors**

GSEA was performed comparing progression and stable tumors for CM07 and CM14 separately.

The significant hallmark gene sets identified in either model were identified, and the enrichment score was plotted for both CM07 and CM14.
